# Supplementary material for: Cognitive and Behavioral Skills Exercises Completed by Patients with Major Depression During Smartphone Cognitive Behavioral Therapy: Secondary Analysis of a Randomized Controlled Trial
Source: PubMed Central journal article supplement (PMC5785683; doi:10.2196/mental.9092), 2018-01-11
Supplement: mental_v5i1e4_app1.pdf [file mental_v5i1e4_app1.pdf]

## Multimedia Appendix 2

### Beneficiaries and nonbeneficiaries of Kokoro-App

| Characteristics                                            |                                                | Beneficiaries<br>(n=31), mean<br>(SD <sup>a</sup> )/ n (%) | Nonbeneficiaries<br>(n=49), mean<br>(SD)/ n (%) | <i>P</i><br>value |
|------------------------------------------------------------|------------------------------------------------|------------------------------------------------------------|-------------------------------------------------|-------------------|
| Sessions completed, mean (SD)                              |                                                | 7.2 (6.8-7.6)                                              | 6.8 (6.3-7.2)                                   | .17               |
| Days taken to complete one session, mean (SD)              |                                                | 10.4 (8.8-11.9)                                            | 11.1 (9.8-12.3)                                 | .50               |
| Actual time (min) per session, mean (SD)                   |                                                | 84.5 (35.2-133)                                            | 49.1 (31.7-66.3)                                | .11               |
| <b>No. of mind maps, completed, mean (SD)</b>              |                                                | 9.5 (6.3-12.7)                                             | 12.2 (8.8-15.6)                                 | .26               |
|                                                            | No. of sad or depressed mind maps, mean (SD)   | 3.5 (2.4-4.7)                                              | 3.1 (1.9-4.2)                                   | .57               |
|                                                            | No. of anxious or worried mind maps, mean (SD) | 3.6 (2.1-5.1)                                              | 2.7 (1.8-3.5)                                   | .23               |
|                                                            | No. of angry mind maps, mean (SD)              | 2.9 (1.4-4.4)                                              | 2.1 (1.3-2.9)                                   | .31               |
|                                                            | No. of happy mind maps, mean (SD)              | 2.2 (1.3-3.1)                                              | 1.8 (0.8-2.8)                                   | .57               |
|                                                            | Level of sad or depressed emotion, mean (SD)   | 3.6 (3.3-4.0)                                              | 3.5 (3.2-3.9)                                   | .70               |
|                                                            | Level of anxious or worried emotion, mean (SD) | 3.6 (3.3-4.0)                                              | 3.5 (3.2-3.8)                                   | .64               |
|                                                            | Level of angry emotion, mean (SD)              | 3.6 (3.2-4.1)                                              | 3.4 (3.0-3.8)                                   | .46               |
|                                                            | Level of happy emotion, mean (SD)              | 3.6 (3.2-4.0)                                              | 3.0 (2.6-3.4)                                   | .04               |
| <b>No. of behavioral activations, completed, mean (SD)</b> |                                                | 19.6 (11.3-28.0)                                           | 10.3 (6.9-13.7)                                 | .02               |
| <b>Mastery or pleasure by behavioral activation</b>        |                                                |                                                            |                                                 |                   |
|                                                            | Mastery expected, mean (SD)                    | 5.1 (4.4-5.8)                                              | 3.9 (3.3-4.5)                                   | .01               |
|                                                            | Mastery achieved, mean (SD)                    | 5.0 (4.3-5.7)                                              | 3.8 (3.3-4.4)                                   | .01               |
|                                                            | Pleasure expected, mean (SD)                   | 5.4 (4.8-6.0)                                              | 4.2 (3.7-4.8)                                   | .01               |
|                                                            | Pleasure achieved, mean (SD)                   | 5.3 (4.6-5.9)                                              | 4.3 (3.7-4.8)                                   | .02               |
| <b>Top 10 activities chosen</b>                            |                                                |                                                            |                                                 |                   |
|                                                            | Listen to favorite music, n (%)                | 67 (9.8)                                                   | 33 (5.8)                                        | <.001             |

|  |                                                                     |                                                            |                |               |      |
|--|---------------------------------------------------------------------|------------------------------------------------------------|----------------|---------------|------|
|  |                                                                     | Read books and magazines, n (%)                            | 60 (8.8)       | 23 (4.0)      |      |
|  |                                                                     | Brew and drink coffee, n (%)                               | 25 (3.7)       | 27 (4.8)      |      |
|  |                                                                     | Hum a tune, n (%)                                          | 24 (3.5)       | 19 (3.3)      |      |
|  |                                                                     | Take a long bath, n (%)                                    | 12 (1.8)       | 29 (5.1)      |      |
|  |                                                                     | Throw away something you don't need from the drawer, n (%) | 16 (2.4)       | 20 (3.5)      |      |
|  |                                                                     | Go to a coffee shop after lunch, n (%)                     | 27 (4.0)       | 1 (0.2)       |      |
|  |                                                                     | Put some bath powder in the bathtub, n (%)                 | 17 (2.5)       | 12 (2.1)      |      |
|  |                                                                     | Close your eyes for 3 min, n (%)                           | 8 (1.2)        | 15 (2.6)      |      |
|  |                                                                     | Take a different route on the way back home, n (%)         | 7 (1.0)        | 15 (2.6)      |      |
|  | <b>Time categories of activities chosen</b>                         |                                                            |                |               |      |
|  |                                                                     | Less than 5 seconds, n (%)                                 | 138 (20.2)     | 136 (23.9)    | .002 |
|  |                                                                     | Less than 5 min, n (%)                                     | 211 (30.9)     | 210 (36.9)    |      |
|  |                                                                     | Less than 60 min, n (%)                                    | 228 (33.4)     | 135 (23.7)    |      |
|  |                                                                     | 60 min or more, n (%)                                      | 105 (15.4)     | 88 (15.5)     |      |
|  | Activities initiated by the patient, n (%)                          |                                                            | 234 (34.3)     | 157 (27.6)    | .01  |
|  | Activities recommended by the patient, n (%)                        |                                                            | 40 (5.9)       | 16 (2.8)      | .01  |
|  | <b>Cognitive restructuring, no. completed per person, mean (SD)</b> |                                                            | 8.0 (5.2-10.9) | 5.2 (3.8-6.6) | .05  |
|  | <b>Cognitive restructuring items used, per person</b>               |                                                            |                |               |      |
|  |                                                                     | No. using fact glasses, mean (SD)                          | 2.8 (1.9-3.7)  | 1.6 (1.1-2.0) | .01  |
|  |                                                                     | No. using % Calculator, mean (SD)                          | 2.2 (1.3-3.1)  | 1.1 (0.8-1.4) | .01  |
|  |                                                                     | No. using friend's call, mean (SD)                         | 1.7 (1.1-2.3)  | 1.3 (0.9-1.8) | .30  |
|  |                                                                     | No. using what-now microphone, mean (SD)                   | 1.6 (1.0-2.3)  | 1.2 (0.8-1.7) | .27  |
|  |                                                                     | Change in emotion level by fact glasses, mean (SD)         | 1.4 (1.1-1.7)  | 1.3 (1.0-1.5) | .45  |
|  |                                                                     | Change in emotion level by % Calculator, mean (SD)         | 1.8 (1.4-2.2)  | 1.3 (0.9-1.6) | .04  |

|  |  |                                                        |               |               |     |
|--|--|--------------------------------------------------------|---------------|---------------|-----|
|  |  | Change in emotion level by friend's call,<br>mean (SD) | 1.9 (1.5-2.4) | 1.4 (1.0-1.8) | .10 |
|  |  | Change in emotion level by what-now, mean<br>(SD)      | 1.8 (1.3-2.3) | 1.5 (1.1-1.9) | .36 |

<sup>a</sup>SD: standard deviation.
